# Supplementary material for: Comparative Analysis of Chromatin-Delivered Biomarkers in the Monitoring of Sepsis and Septic Shock: A Pilot Study
Source: MDPI journal article supplement (doi:10.3390/ijms22189935), 2021-09-14
Supplement: s1 [file s1]

| Correlation<br>Spearman r |             | A           | B      | C           | D      | E      | F       | G        | H      | I      | J      | K      | L      | M      | N      | O      | P       | Q      | R         |
|---------------------------|-------------|-------------|--------|-------------|--------|--------|---------|----------|--------|--------|--------|--------|--------|--------|--------|--------|---------|--------|-----------|
|                           |             | Nucl. kit 1 | CitrH3 | Nucl. kit 2 | HMGB1  | MBI    | ICU LOS | HOSP LOS | SOFA   | SAP    | MAP    | RF     | ALPH   | BIL    | GLUC1  | TPA1   | Fibrin1 | DD1    | NtProBNP1 |
|                           |             |             |        |             |        |        |         |          |        |        |        |        |        |        |        |        |         |        |           |
| 1                         | Nucl. kit 1 | 1.000       | 0.006  | 0.455       | 0.248  | 0.012  | 0.226   | 0.055    | -0.328 | 0.316  | 0.347  | 0.632  | -0.900 | 0.054  | -0.207 | 0.812  | 0.812   | 0.086  | 0.000     |
| 2                         | CitrH3      | 0.006       | 1.000  | 0.770       | 0.030  | -0.598 | 0.378   | 0.348    | 0.712  | -0.729 | -0.711 | 0.337  | -0.100 | 0.559  | 0.188  | 0.406  | 0.667   | 0.771  | -0.536    |
| 3                         | Nucl. kit 2 | 0.455       | 0.770  | 1.000       | 0.152  | -0.720 | 0.421   | 0.311    | 0.557  | -0.347 | -0.292 | 0.607  | -0.600 | 0.577  | -0.061 | 0.551  | 0.812   | 0.771  | -0.429    |
| 4                         | HMGB1       | 0.248       | 0.030  | 0.152       | 1.000  | 0.195  | 0.854   | 0.701    | 0.105  | 0.280  | -0.067 | 0.448  | -0.100 | -0.234 | -0.657 | -0.522 | 0.174   | 0.886  | -0.786    |
| 5                         | MBI         | 0.012       | -0.598 | -0.720      | 0.195  | 1.000  | -0.126  | -0.113   | -0.757 | 0.532  | 0.382  | -0.198 | 0.667  | -0.360 | -0.208 | -0.493 | -0.145  | -0.371 | 0.036     |
| 6                         | ICU LOS     | 0.226       | 0.378  | 0.421       | 0.854  | -0.126 | 1.000   | 0.929    | 0.405  | -0.122 | -0.333 | 0.642  | -0.359 | -0.109 | -0.306 | -0.412 | 0.206   | 0.943  | -0.873    |
| 7                         | HOSP LOS    | 0.055       | 0.348  | 0.311       | 0.701  | -0.113 | 0.929   | 1.000    | 0.408  | -0.287 | -0.327 | 0.661  | -0.100 | 0.109  | -0.040 | -0.471 | -0.029  | 0.886  | -0.873    |
| 8                         | SOFA        | -0.328      | 0.712  | 0.557       | 0.105  | -0.757 | 0.405   | 0.408    | 1.000  | -0.525 | -0.503 | 0.188  | -0.103 | 0.426  | 0.065  | -0.194 | -0.239  | 0.667  | -0.599    |
| 9                         | SAP         | 0.316       | -0.729 | -0.347      | 0.280  | 0.532  | -0.122  | -0.287   | -0.525 | 1.000  | 0.808  | -0.129 | 0.100  | 0.000  | -0.579 | -0.176 | -0.088  | -0.314 | 0.036     |
| 10                        | MAP         | 0.347       | -0.711 | -0.292      | -0.067 | 0.382  | -0.333  | -0.327   | -0.503 | 0.808  | 1.000  | 0.049  | 0.100  | 0.432  | -0.134 | 0.551  | -0.058  | -0.812 | 0.321     |
| 11                        | RF          | 0.632       | 0.337  | 0.607       | 0.448  | -0.198 | 0.642   | 0.661    | 0.188  | -0.129 | 0.049  | 1.000  | -0.359 | 0.374  | -0.086 | 0.708  | 0.708   | 0.577  | -0.630    |
| 12                        | ALPH        | -0.900      | -0.100 | -0.600      | -0.100 | 0.667  | -0.359  | -0.100   | -0.103 | 0.100  | 0.100  | -0.359 | 1.000  | 0.400  | -0.300 | -0.500 | 0.000   | 0.500  | -0.800    |
| 13                        | BIL         | 0.054       | 0.559  | 0.577       | -0.234 | -0.360 | -0.109  | 0.109    | 0.426  | 0.000  | 0.432  | 0.374  | 0.400  | 1.000  | 0.209  | 0.353  | 0.221   | 0.205  | -0.174    |
| 14                        | GLUC1       | -0.207      | 0.188  | -0.061      | -0.657 | -0.208 | -0.306  | -0.040   | 0.065  | -0.579 | -0.134 | -0.086 | -0.300 | 0.209  | 1.000  | 0.132  | -0.441  | -0.580 | 0.378     |
| 15                        | TPA1        | 0.812       | 0.406  | 0.551       | -0.522 | -0.493 | -0.412  | -0.471   | -0.194 | -0.176 | 0.551  | 0.708  | -0.500 | 0.353  | 0.132  | 1.000  | 0.603   | -0.616 | 0.000     |
| 16                        | Fibrin1     | 0.812       | 0.667  | 0.812       | 0.174  | -0.145 | 0.206   | -0.029   | -0.239 | -0.088 | -0.058 | 0.708  | 0.000  | 0.221  | -0.441 | 0.603  | 1.000   | 0.462  | -0.435    |
| 17                        | DD1         | 0.086       | 0.771  | 0.771       | 0.886  | -0.371 | 0.943   | 0.886    | 0.667  | -0.314 | -0.812 | 0.577  | 0.500  | 0.205  | -0.580 | -0.616 | 0.462   | 1.000  | -0.900    |
| 18                        | NtProBNP1   | 0.000       | -0.536 | -0.429      | -0.786 | 0.036  | -0.873  | -0.873   | -0.599 | 0.036  | 0.321  | -0.630 | -0.800 | -0.174 | 0.378  | 0.000  | -0.435  | -0.900 | 1.000     |

| Correlation<br>P values |             | A         | B      | C         | D     | E     | F          | G          | H     | I     | J     | K     | L     | M     | N     | O     | P       | Q     | R         |
|-------------------------|-------------|-----------|--------|-----------|-------|-------|------------|------------|-------|-------|-------|-------|-------|-------|-------|-------|---------|-------|-----------|
|                         |             | Nucl.kit1 | CitrH3 | Nucl.kit2 | HMGB1 | MBI   | ICULOS     | HOSPLOS    | SOFA  | SAP   | MAP   | RF    | ALPH  | BIL   | GLUC1 | TTPA1 | Fibrin1 | DD1   | NtProBNP1 |
|                         |             |           |        |           |       |       |            |            |       |       |       |       |       |       |       |       |         |       |           |
| 1                       | Nucl. kit 1 |           | 1.000  | 0.191     | 0.492 | 0.979 | 0.529      | 0.884      | 0.351 | 0.372 | 0.324 | 0.057 | 0.083 | 0.917 | 0.565 | 0.072 | 0.072   | 0.919 | 1.000     |
| 2                       | H3citr      | 1.000     |        | 0.013     | 0.946 | 0.073 | 0.280      | 0.323      | 0.025 | 0.021 | 0.025 | 0.343 | 0.950 | 0.206 | 0.600 | 0.433 | 0.156   | 0.103 | 0.236     |
| 3                       | Nucl. kit 2 | 0.191     | 0.013  |           | 0.682 | 0.023 | 0.226      | 0.379      | 0.099 | 0.324 | 0.411 | 0.069 | 0.350 | 0.186 | 0.872 | 0.272 | 0.072   | 0.103 | 0.354     |
| 4                       | HMGB1       | 0.492     | 0.946  | 0.682     |       | 0.587 | 0.003      | 0.028      | 0.773 | 0.432 | 0.857 | 0.198 | 0.950 | 0.623 | 0.044 | 0.300 | 0.750   | 0.033 | 0.048     |
| 5                       | MBI         | 0.979     | 0.073  | 0.023     | 0.587 |       | 0.726      | 0.752      | 0.014 | 0.116 | 0.272 | 0.583 | 0.267 | 0.426 | 0.558 | 0.333 | 0.778   | 0.497 | 0.963     |
| 6                       | ICU LOS     | 0.529     | 0.280  | 0.226     | 0.003 | 0.726 |            | 2.690e-004 | 0.244 | 0.734 | 0.343 | 0.050 | 0.633 | 0.817 | 0.385 | 0.419 | 0.686   | 0.017 | 0.017     |
| 7                       | HOSP LOS    | 0.884     | 0.323  | 0.379     | 0.028 | 0.752 | 2.690e-004 |            | 0.239 | 0.415 | 0.352 | 0.043 | 0.950 | 0.813 | 0.915 | 0.342 | 0.956   | 0.033 | 0.016     |
| 8                       | SOFA        | 0.351     | 0.025  | 0.099     | 0.773 | 0.014 | 0.244      | 0.239      |       | 0.122 | 0.140 | 0.601 | 0.900 | 0.348 | 0.858 | 0.756 | 0.667   | 0.156 | 0.162     |
| 9                       | SAP         | 0.372     | 0.021  | 0.324     | 0.432 | 0.116 | 0.734      | 0.415      | 0.122 |       | 0.006 | 0.722 | 0.950 | 1.000 | 0.083 | 0.747 | 0.864   | 0.564 | 0.952     |
| 10                      | MAP         | 0.324     | 0.025  | 0.411     | 0.857 | 0.272 | 0.343      | 0.352      | 0.140 | 0.006 |       | 0.897 | 0.950 | 0.327 | 0.710 | 0.272 | 0.933   | 0.072 | 0.498     |
| 11                      | RF          | 0.057     | 0.343  | 0.069     | 0.198 | 0.583 | 0.050      | 0.043      | 0.601 | 0.722 | 0.897 |       | 0.567 | 0.408 | 0.815 | 0.150 | 0.150   | 0.250 | 0.152     |
| 12                      | ALPH        | 0.083     | 0.950  | 0.350     | 0.950 | 0.267 | 0.633      | 0.950      | 0.900 | 0.950 | 0.950 | 0.567 |       | 0.750 | 0.683 | 1.000 | 1.000   | 1.000 | 0.333     |
| 13                      | BIL         | 0.917     | 0.206  | 0.186     | 0.623 | 0.426 | 0.817      | 0.813      | 0.348 | 1.000 | 0.327 | 0.408 | 0.750 |       | 0.647 | 0.500 | 0.700   | 0.767 | 0.750     |
| 14                      | GLUC1       | 0.565     | 0.600  | 0.872     | 0.044 | 0.558 | 0.385      | 0.915      | 0.858 | 0.083 | 0.710 | 0.815 | 0.683 | 0.647 |       | 0.811 | 0.400   | 0.239 | 0.406     |
| 15                      | TTPA1       | 0.072     | 0.433  | 0.272     | 0.300 | 0.333 | 0.419      | 0.342      | 0.756 | 0.747 | 0.272 | 0.150 | 1.000 | 0.500 | 0.811 |       | 0.211   | 0.300 | 1.000     |
| 16                      | Fibrin1     | 0.072     | 0.156  | 0.072     | 0.750 | 0.778 | 0.686      | 0.956      | 0.667 | 0.864 | 0.933 | 0.150 | 1.000 | 0.700 | 0.400 | 0.211 |         | 0.433 | 0.378     |
| 17                      | DD1         | 0.919     | 0.103  | 0.103     | 0.033 | 0.497 | 0.017      | 0.033      | 0.156 | 0.564 | 0.072 | 0.250 | 1.000 | 0.767 | 0.239 | 0.300 | 0.433   |       | 0.083     |
| 18                      | NtProBNP1   | 1.000     | 0.236  | 0.354     | 0.048 | 0.963 | 0.017      | 0.016      | 0.162 | 0.952 | 0.498 | 0.152 | 0.333 | 0.750 | 0.406 | 1.000 | 0.378   | 0.083 |           |
